# Supplementary material
Source: Springer Nature journal article supplement (https://www.springermedizin.de/resource/supplementary/12936_2008_623_MOESM1_ESM.pdf/9547846)

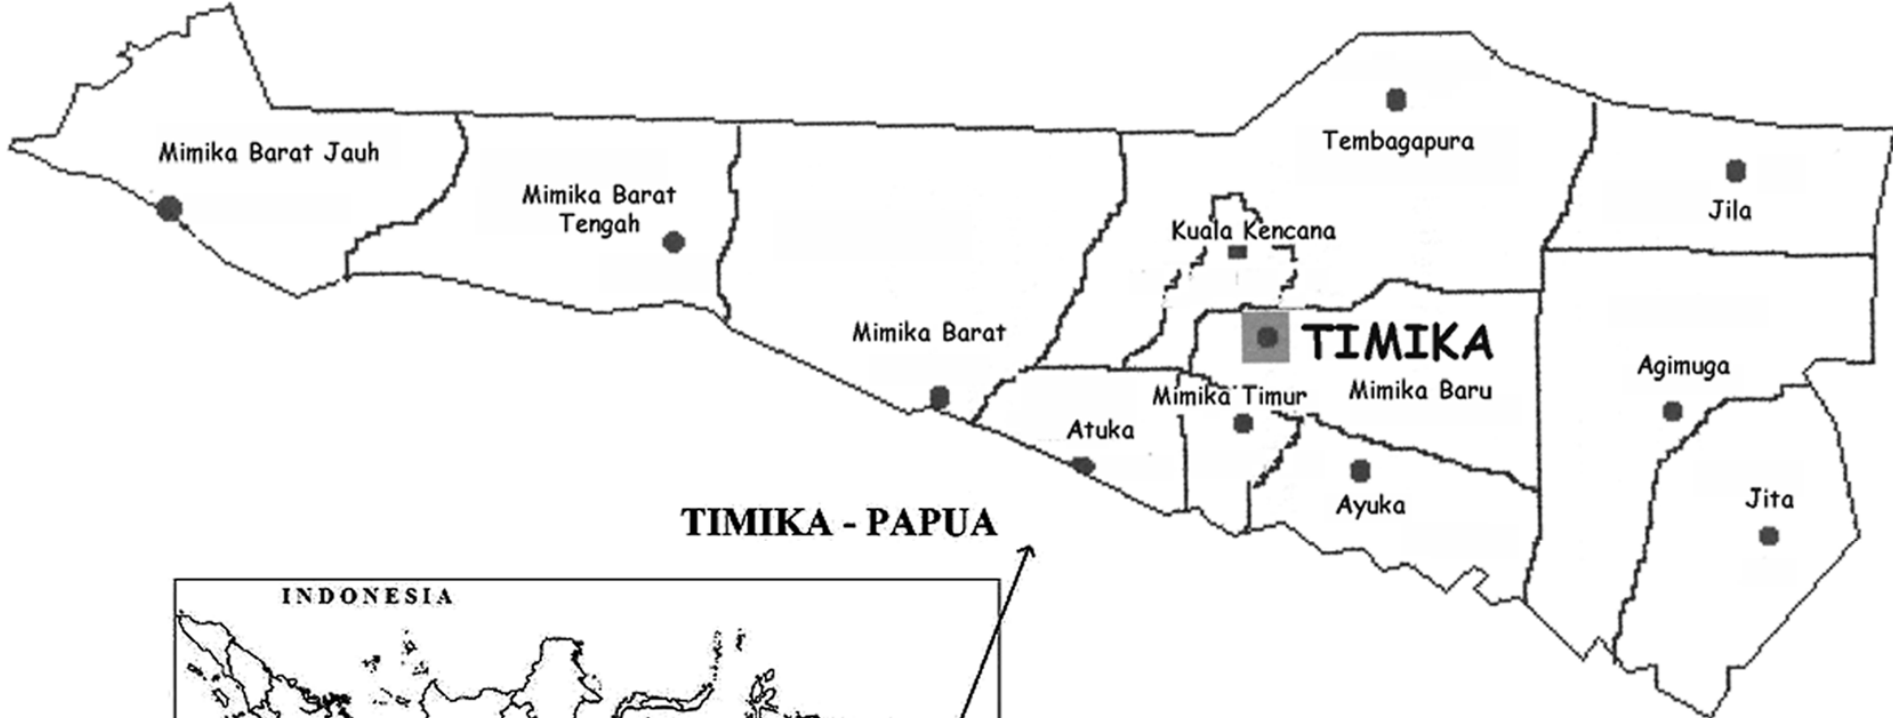

**TIMIKA - PAPUA**

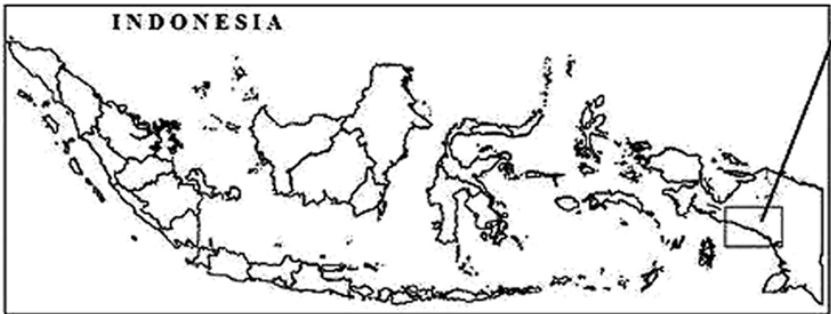

Supplement: MOESM1 [file 9547846]
